# Supplementary material
Source: PubMed Central journal article supplement (PMC7417378)
Supplement: mmc1.pdf [file mmc1.pdf]

## The Association of ICU Acuity With Adherence to ICU Evidence-Based Processes of Care

*Kelly C. Vranas, MD; Jennifer Y. Scott, MS; Omar Badawi, PharmD, MPH; Michael O. Harhay, PhD; Christopher G. Slatore, MD; Donald R. Sullivan, MD; and Meeta Prasad Kerlin, MD*

CHEST 2020; 158(2):579-587

*Online supplements are not copyedited prior to posting and the author(s) take full responsibility for the accuracy of all data.*

© 2020 AMERICAN COLLEGE OF CHEST PHYSICIANS. Reproduction of this article is prohibited without written permission from the American College of Chest Physicians. See online for more details. DOI: 10.1016/j.chest.2020.02.061

## **e-Appendix 1.**

### **Supplemental Results: Adjusted Analyses of Venous Thromboembolism and Stress Ulcer Prophylaxis Outcomes**

With highest ICU acuity as the reference, we found no difference in adherence to venous thromboembolism (VTE) prophylaxis between low- and medium-acuity ICUs (low acuity adjusted odds ratio [aOR]: 1.08, 95% confidence interval [CI] 0.98-1.18; medium-acuity aOR: 0.97, 95% CI: 0.90-1.05). However, high-acuity ICUs were less likely to be adherent to VTE prophylaxis compared to highest-acuity ICUs (OR 0.92, 95% CI 0.87-0.98). For stress ulcer prophylaxis, a similar pattern emerged in which there were no differences between low- and medium-acuity ICUs with the highest-acuity ICUs (low-acuity aOR: 1.06, 95% CI 0.98-1.14; medium-acuity aOR: 1.02, 95% CI 0.96-1.09), but high-acuity ICUs had higher odds of adherence (aOR 1.07, 95% CI 1.02-1.13).

**e-Figure 1.** Crude rates of adherence for venous thromboembolism and stress ulcer prophylaxis outcomes.

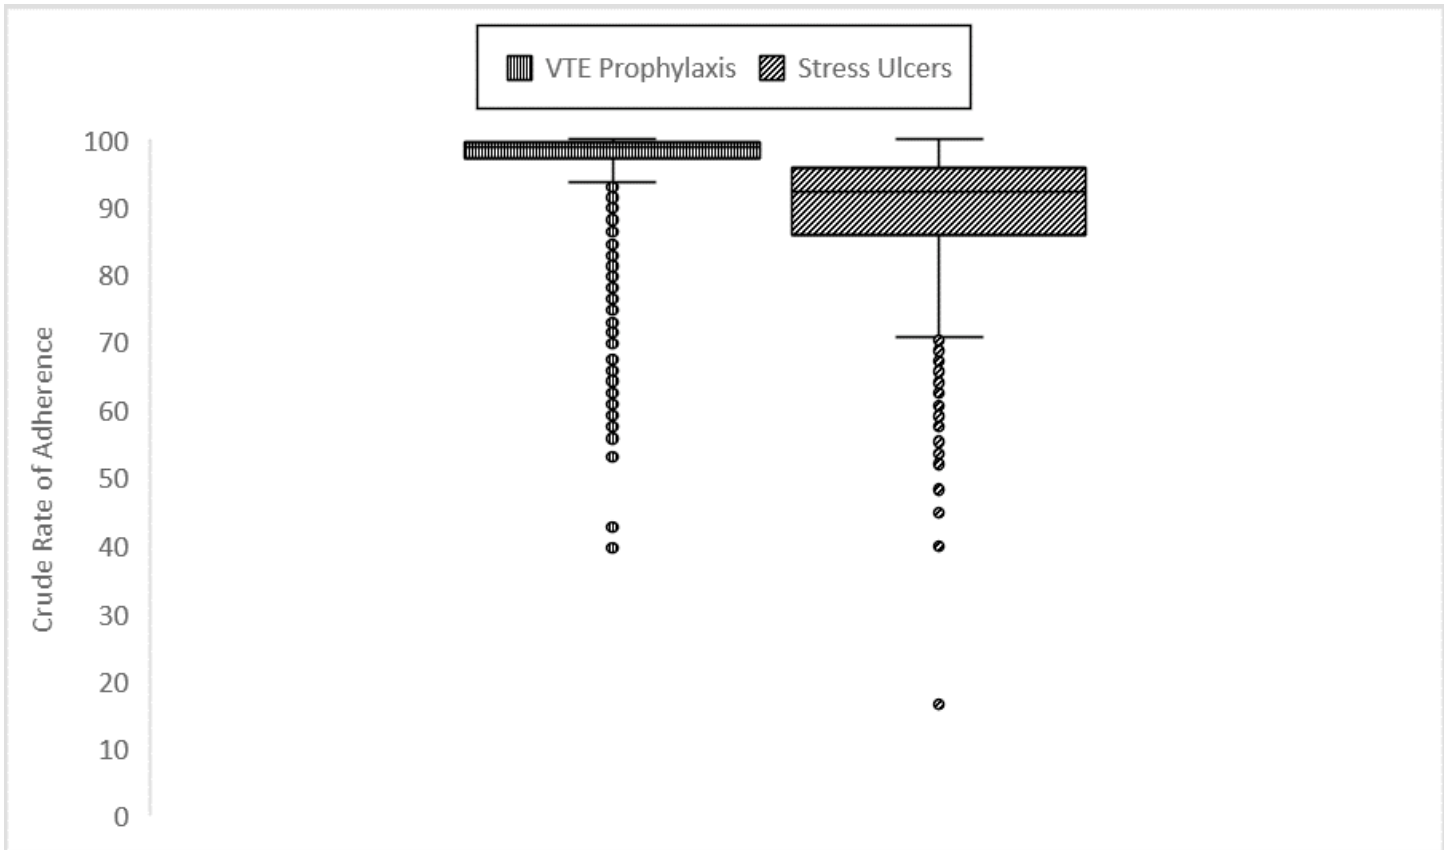

**e-Figure 2.** Crude rates of non-adherence for the outcomes of hypoglycemia, sustained hyperglycemia, and liberal transfusion practices.

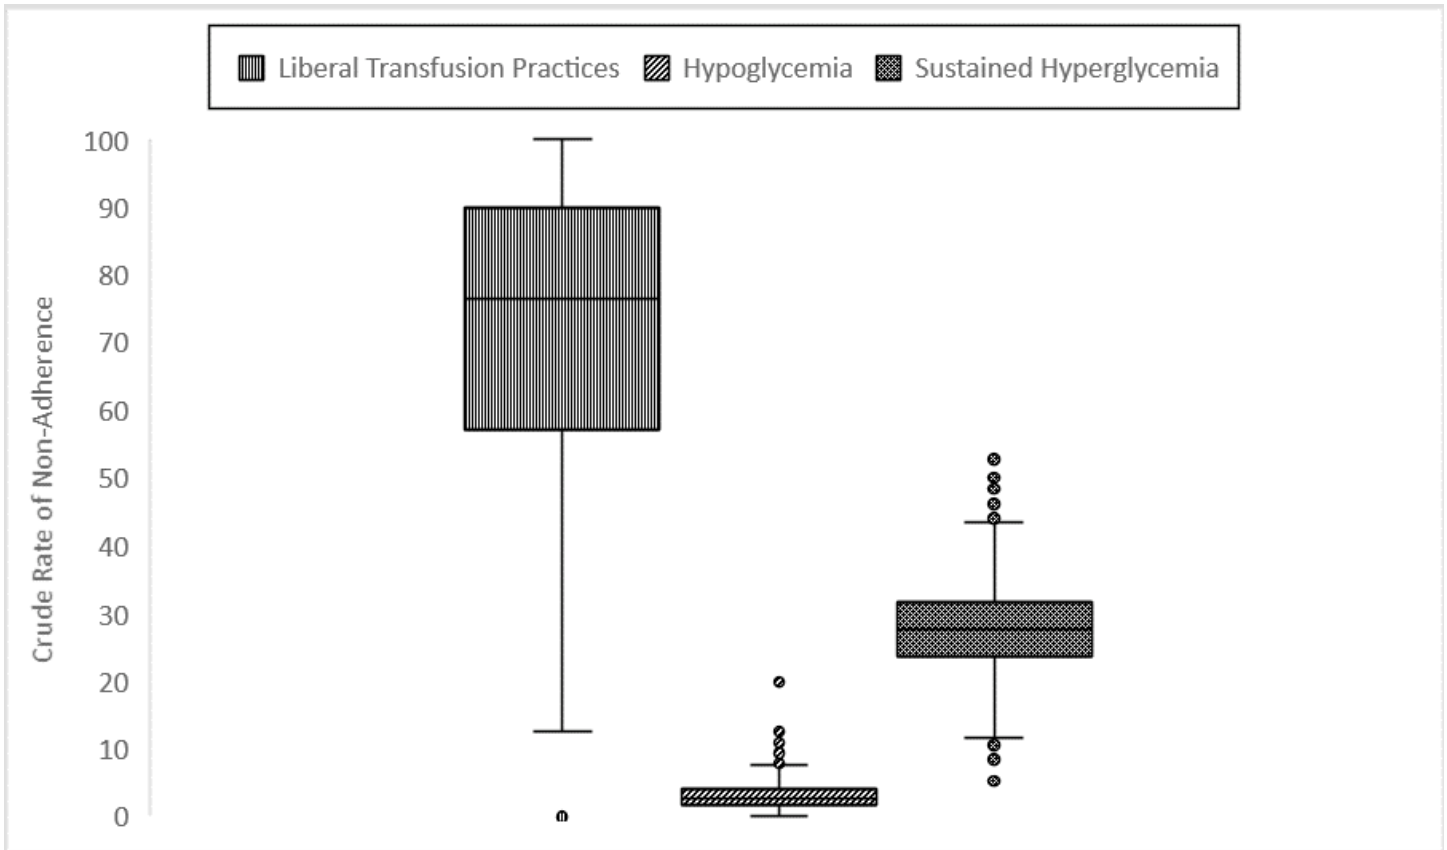

**e-Table 1. Intensive care unit (ICU) acuity and odds of adherence to venous thromboembolism (VTE) and stress ulcer prophylaxis.**

| <b>ICU Acuity</b> | <b>VTE Prophylaxis<br/>OR (95% CI)<br/>N = 731,741<sup>a</sup></b> | <b>Stress Ulcer Prophylaxis<br/>OR (95% CI)<br/>N = 353,431<sup>a</sup></b> |
|-------------------|--------------------------------------------------------------------|-----------------------------------------------------------------------------|
| Highest-Acuity    | <i>Reference</i>                                                   | <i>Reference</i>                                                            |
| High-Acuity       | 0.92 (0.87, 0.98)                                                  | 1.07 (1.02, 1.13)                                                           |
| Medium-Acuity     | 0.97 (0.90, 1.05)                                                  | 1.02 (0.96, 1.09)                                                           |
| Low-Acuity        | 1.08 (0.98, 1.18)                                                  | 1.06 (0.98, 1.14)                                                           |

Abbreviations: OR = Odds Ratio; CI = Confidence Interval

<sup>a</sup>Total number of eligible patients for each outcome
